# Supplementary material for: A critical inventory of the mediterranean endemics in the egyptian flora
Source: Springer Nature journal article supplement (doi:10.1007/s10531-023-02555-5), 2023-02-17
Supplement: MOESM1 [file 24041764]

**Appendix 1** The updated list of Mediterranean endemics in Egypt in the present study compared to the three previous related studies: 1-Boulos (1999- 2005); 2- Med-Checklist (Greuter et al. 1984-1989, Greuter and von Raab-Straube 2008); 3-Ahmed (2009) and 4-present study. (×) refers to *Excludenda* (i.e. surely non-Mediterranean endemics), (√) refers to *Includenda* (i.e. surely Mediterranean endemics), (■) refers to *extendenda* (i.e. species mainly distributed in the Mediterranean basin but having extensions to neighbouring areas), and (?) refers to *Inquirenda* (i.e. taxa doubtfully reported to Egypt that should be better searched in the nation). Floristic regions are abbreviated as follows: SA-AR: Saharo Arabian, IR-TR: Irano Turanian and EU-SR: Euro Siberian.

| **Scientific name** | **Reason for exclusion** | **Chorotype code after Good (1974)** | **Source** | **1** | **2** | **3** | **4** |
| --- | --- | --- | --- | --- | --- | --- | --- |
| **Amaranthaceae Juss.** | | | | | | | |
| *Agathophora alopecuroides*var.*alopecuroides* | Iran, Iraq, Pakistan, Saudi Arabia | 5, 6, 11 | POWO (2022) | × | √ | × | × |
| *Anabasis syriaca* Iljin | Deserts of Palestine , Isthmic desert of Egypt | 6, 11 | Danin and Fragman- Sapir (2016), CAI, CAIRC, Boulos (1999-2005) | √ | √ | × | ■ |
| *Atriplex leucoclada* var. *inamoena*(Aellen) Zohary | AfghanistanIran, Iraq, Kazakhstan, Kuwait, Oman, Pakistan, Saudi Arabia, Transcaucasus, Turkmenistan, Uzbekistan, Yemen | 2, 5, 6, 11 | POWO (2022),Boulos (1999-2005) | × | √ | × | × |
| *Bassia arabica*(Boiss.) Maire & Weiller | Gulf States, Saudi Arabia | 6, 11 | POWO (2022) | × | √ | × | × |
| *Haloxylon negevensis*(Iljin & Zohary) L.Boulos | Central Sinai, Deserts of South Israel | 6, 11 | POWO (2022), Hassler (2004-2022) | √ | √ | × | ■ |
| *Haloxylon schmittianum*Pomel | Saudi Arabia,absent in Egypt and reported in Egypt in Med-Checklist (2016) in error | 6, 11 | POWO (2022), Boulos (1999-2005) | × | √ | × | ? |
| *Haloxylon tamariscifolium*(L.) Pau | Mauritania, Western Sahara, absent in Egypt and reported in Egypt in Med-Checklist (2016) in error | 6, 12 | POWO (2022), Boulos (1999-2005) | × | √ | × | ? |
| *Salsola longifolia*Forssk. | Western Sahara, Gulf States, Mauritania, Arabian Peninsula | 6, 11, 12 | POWO (2022), Hassler (2004-2022) | √ | √ | × | × |
| *Salsola schweinfurthii*Solms | Gulf States, Oman, Saudi Arabia | 6, 11 | POWO (2022),Boulos (1999-2005) | × | √ | × | × |
| *Salsola villosa*Schult. | India, Saudi Arabia | 6, 11, 19 | POWO (2022), Boulos (1999-2005) | × | √ | × | × |
| *Suaeda altissima*(L.) Pall. | Xinjiang and Afghanistan. | 5, 6 | POWO (2022) | √ | × | × | × |
| *Suaeda pruinosa*Lange | Djibouti | 6, 12 | POWO (2022), GBIF (2022) | √ | √ | √ | × |
| **Amaryllidaceae J.St.-Hil.** | | | | | | | |
| *Allium aschersonianum*Barbey | West IR-TR | 5 | Feinbrun-Dothan (1978, 1986) | √ | × | × | × |
| *Allium barthianum*Asch. & Schweinf. |  | 6 |  | √ | × | × | √ |
| *Allium blomfieldianum*Asch. & Schweinf. |  | 6 |  | √ | × | √ | √ |
| *Allium curtum*Boiss. subsp. *palaestinum*Feinbrun | IR-TR | 5 | Feinbrun-Dothan (1978, 1986) | √ | × | × | × |
| *Allium curtum*Boiss. & Gaill.  subsp.*curtum* | IR-TR | 5 | Feinbrun-Dothan (1978, 1986) | √ | × | × | × |
| *Allium mareoticum*Bornm. & Gauba |  | 6 |  | √ | × | √ | √ |
| *Allium roseum* var. *tourneuxii*Boiss. | Saharo Sindian | 5, 11 | Feinbrun-Dothan (1978, 1986) | √ | × | × | × |
| *Allium sphaerocephalon* subsp. *arvense*(Guss.) Arcang. | Canary Islands, IR-TR Anatolia of Turkey, Central Europe | 2, 5, 6, 7 | Euro+Med (2006), eflora Maghreb (2021), Hassler (2004-2022) | √ | × | × | × |
| *Allium trifoliatum*Cirillo |  | 6 |  | √ | × | √ | √ |
| *Pancratium arabicum*Sickenb. |  | 6 |  | √ | × | √ | √ |
| **Apiaceae Lindl.** | | | | | | | |
| *Ammoides pusilla*(Brot.) Breistr. | Desert Oases in Egypt (Dakhla oases), Suadi Arabia | 6, 11 | Boulos (1999-2005), CAI, Hassler (2004-2022), Euro+Med (2006), Roskov et al. (2019) | √ | × | × | × |
| *Apium crassipes*(W.D.J.Koch ex Rchb.) Rchb.f. |  | 6 |  | √ | × | × | √ |
| *Bupleurum nanum*Poir. | Mediterranean extending to deserts (SA-AR), Western desert in Egypt | 6, 11 | GBIF (2022) | √ | × | × | ■ |
| *Bupleurum nodiflorum*Sm. | Extends to IR-TR parts of Syria (Jbel Druze), Turkey (Anatolia) and Israel | 5, 6 | Hassler (2004-2022) | √ | × | √ | ■ |
| *Daucus syrticus*Murb. | Europe, West Asia, North America, Australia | 2, 6, 8, 9, 10, 11, 34, 35, 36 | Hassler (2004-2022), Lain (1981) | √ | √ | √ | × |
| *Leiotulus alexandrinus*Ehrenb. | Extends to north African deserts (Eastern Desert, Great Southwestern Desert of Egypt) | 6, 11 | Hassler (2004-2022), Abd El-Ghani et al. (2017) | √ | × | √ | ■ |
| *Ridolfia segetum*(L.) Moris | Canary Islands, Arabian Peninsula. | 6, 7, 11 | POWO (2022) | √ | × | × | × |
| *Stoibrax dichotomum*(L.) Raf. | Suadi Arabia, North African deserts of Algeria and Morocco | 6, 11 | GBIF (2022), African Plant Database (2022) | √ | × | × | × |
| *Tordylium aegyptiacum*(L.) Poir. | Central Iraq | 5, 6 | POWO (2022) | × | × | √ | × |
| **Apocynaceae Juss.** | | | | | | | |
| *Caralluma europaea*(Guss.) N.E.Br. | Extends to SA-AR deserts of Israel | 6, 11 | Danin and Fragman- Sapir (2016), Flowers in Israel (2005-2022) | √ | √ | √ | ■ |
| *Rhazya greissii*Täckh. & Boulos | Desert Oases in Egypt (Kharga Oases) | 6, 11 | POWO (2022), GBIF (2022), Euro+Med (2006) | × | √ | × | ■ |
| **Araceae Juss.** | | | | | | | |
| *Biarum olivieri*Blume | East SA-AR | 11 | Feinbrun-Dothan (1978, 1986) | √ | × | × | × |
| **Aristolochiaceae Juss.** | | | | | | | |
| *Aristolochia maurorum*L. | Mesopotamian, inner and east Anatolia, Iran, Iraq | 5, 6 | Hassler (2004-2022), Euro+Med (2006), Med-Checklist (2016), POWO (2022), GBIF (2022) | × | √ | × | × |
| **Asparagaceae Juss.** | | | | | | | |
| *Asparagus aphyllus*L. | Arabian Peninsula | 6, 11 | POWO (2022), Ahmed 2009 | √ | × | × | × |
| *Bellevalia mauritanica*Pomel |  | 6 |  | √ | × | √ | √ |
| *Bellevalia romana*(L.) Sweet | Netherlands | 2, 6 | GBIF (2022), JSTOR (2022), Hassler (2004-2022) | √ | × | √ | × |
| *Bellevalia salah-eidii*Täckh. & Boulos |  | 6 |  | √ | × | √ | √ |
| *Bellevalia sessiliflora*(Viv.) Kunth |  | 6 |  | √ | × | √ | √ |
| *Bellevalia trifoliata*(Ten.) Kunth | Baharia oases, eastern desert, IR-TR part of Palestine , SA-AR part of North Africa and Turkey | 5, 6, 11 | CAI, CAIM, Danin and Fragman- Sapir (2016), GBIF (2022), Euro+Med (2006) | √ | × | √ | ■ |
| *Bellevalia warburgii*Feinbrun |  | 6 |  | √ | × | × | √ |
| *Leopoldia bicolor*(Boiss.) Eig & Feinbrun |  | 6 |  | √ | √ | × | √ |
| *Muscari albiflorum*(Täckh. & Boulos) Hosni |  | 6 |  | √ | × | √ | √ |
| *Muscari parviflorum*Desf. |  | 6 |  | √ | × | √ | √ |
| *Muscari salah-eidii*(Täckh. & Boulos) Hosni |  | 6 |  | √ | × | × | √ |
| *Ornithogalum arabicum*L. | Sudan | 6, 12 | POWO (2022) | √ | × | √ | × |
| *rnithogalum narbonense*L. | Iran, Iraq | 5, 6 | POWO (2022), Ahmed 2009 | √ | × | × | × |
| *Scilla peruviana*L. |  | 6 |  | √ | × | × | √ |
| **Asteraceae Bercht. & J.Presl** | | | | | | | |
| *Ambrosia maritima*L. | Arabian Peninsula, Tropical Africa | 6, 11, 12 | POWO (2022) | √ | × | √ | × |
| *Anacyclus monanthos* subsp. *monanthos*(L.) Thell. | Western desert, SA-AR part of Sinai, SA-AR part of Algeria | 6, 11 | CAI, Hatim et al. (2021), GBIF (2022) | √ | √ | √ | ■ |
| *Anthemis bornmuelleri*Stoj. & Acht. | SA-AR parts of Syria (Jbel Druze), Saudi Arabia | 5, 6, 11 | POWO (2022), Hassler (2004-2022), Chikhali (2022) | × | × | × | × |
| *Anthemis chia*L. |  | 6 |  | √ | × | √ | √ |
| *Anthemis indurata*Delile | Arabian Peninsula | 6, 11 | POWO (2022) | √ | × | × | × |
| *Anthemis microsperma*Boiss. & Kotschy |  | 6 |  | √ | √ | √ | √ |
| *Anthemis scrobicularis*subsp.*fungosa*Yavin | Douptfully present in Egypt | 11 | Yavin (1972), Frumin and Shammash (2008), Greuter et al. (2008), Euro+Med (2006) | × | √ | × | ? |
| *Artemisia inculta*Sieber ex DC. | Douptfully present in Egypt | 6, 11 | Täckholm (1974) | × | √ | × | ? |
| *Asteriscus aquaticus*(L.) Less. | Central Europe | 2, 6 | POWO (2022) | √ | × | × | × |
| *Atractylis boulosii*Täckh. | Central Sinai | 6, 11 | POWO (2022) | √ | √ | × | ■ |
| *Atractylis phaeolepis*Pomel | Central and South Sinai, deserts of Israel | 6, 11 | Hassler (2004-2022) | × | √ | × | ■ |
| *Atractylis prolifera*Boiss. | SA-AR | 11 | Jafri and El-Gadi (1977-1988) | × | √ | × | × |
| *Atractylis serratuloides*Sieber ex Cass. | SA-AR | 11 | Jafri and El-Gadi (1977-1988) | √ | √ | × | × |
| *Carduus argentatus*L. | Pakistan | 5, 6 | POWO (2022) | × | √ | × | × |
| *Carlina involucrata*Poir. | SA-AR | 11 | Jafri and El-Gadi (1977-1988) | √ | √ | √ | × |
| *Carthamus glaucus* subsp. *alexandrinus*(Boiss. & Heldr.) Hanelt | Ukraine, Krym, Caucasus and Iran. | 2, 5, 6 | POWO (2022) | √ | √ | × | × |
| *Carthamus mareoticus*Delile | Western desert in Egypt | 6, 11 | Boulos (1999-2005) | √ | √ | × | ■ |
| *Carthamus tenuis* subsp.*foliosus*(Boiss.) Hanelt | Nile valley, Oases, deserts of Egypt | 6, 11 | Boulos (1999-2005), CAI | √ | √ | × | ■ |
| *Centaurea aegialophila*Wagenitz |  | 6 |  | √ | × | × | √ |
| *Centaurea alexandrina*Delile | Chad, Mali | 6, 12 | POWO (2022) | √ | √ | × | × |
| *Centaurea bimorpha* Viv. | Western Sahara, deserts of Algeria and Tunisia | 6, 11 | POWO (2022), African Plant Database (2022) | √ | √ | × | ■ |
| *Centaurea damascena*Boiss. | Absent in Egypt and recorded in Egypt in Med-Checklist (2016) in error | 6, 11 | Danin A and Fragman- Sapir (2016), Flowers in Israel (2005-2022) | × | √ | × | ? |
| *Centaurea furfuracea*Coss. & Durieu | SA-AR | 11 | Jafri and El-Gadi (1977-1988) | √ | √ | × | × |
| *Centaurea glomerata*Vahl | Extends to SA-AR Great Southwestern Desert, Nile Valley and southern Sinai | 6, 11 | GBIF (2022), TANE, CAI | √ | √ | √ | ■ |
| *Centaurea lanulata*Eig | Deserts of Palestine, absent in Egypt and recorded in Egypt in Med-Checklist (2016) in error | 6, 11 | Danin A and Fragman- Sapir (2016), Flowers in Israel (2005-2022) | × | √ | × | ? |
| *Centaurea postii*Boiss. | South Sinai and Syrian deserts | 6, 11 | Hassler (2004-2022), Täckholm (1974) | √ | √ | × | ■ |
| *Centaurea procurrens*Sieber ex Spreng. | South Sinai and Syrian deserts | 6, 11 | Hassler M (2004-2022), POWO (2022) | √ | √ | × | ■ |
| *Centaurea pullata*L. | Douptfully present in Egypt | 6 | El-Beheiry et al. (2020) | √ | √ | √ | ? |
| *Centaurea pumilio*L. |  | 6 |  | √ | √ | √ | √ |
| *Chlamydophora tridentata*(Delile) Ehrenb. ex Less. | SA-AR | 11 | Zohary (1966, 1987) | √ | √ | × | × |
| *Crepis aculeata*Boiss. |  | 6 |  | √ | √ | × | √ |
| *Crepis clausonis*(Pomel) Batt. & Trab. | Douptfully present in Egypt | 6 | Boulos (1999-2005), GBIF (2022), JSTOR (2022), Euro+Med (2006), Hassler (2004-2022) | √ | √ | × | ? |
| *Crepis libyca*(Pamp.) Babc. |  | 6 |  | √ | √ | × | √ |
| *Crepis nigricans*Viv. | SA-AR | 11 | Jafri and El-Gadi (1977-1988) | √ | √ | × | × |
| *Cynara cornigera* Lindl. |  | 6 |  | √ | √ | × | √ |
| *Daveaua anthemoides*Mariz | Not recorded in Egypt in Egyptian flora books, herbaria or literature | 6 | Boulos (1999-2005), Täckholm (1974), GBIF (2022) | × | √ | × | ? |
| *Dittrichia viscosa* subsp.*angustifolia*(Bég.) Greuter | Nile Delta, South Sinai, Anatolia of Turkey, European Turkey, deserts of Israel, Jbel Druze of Syria | 2, 5, 6, 11 | Boulos (1999-2005), Hassler (2004-2022) | √ | √ | √ | ■ |
| *Echinops spinosissimus*Turra | Cameroon, Mauritania, Western Sahara | 6, 12 | POWO (2022) | √ | × | √ | × |
| *Echinops philistaeus*Feinbrun & Zohary | Not recorded in Egypt in Egyptian flora books or herbaria or literature | 6 | Boulos (1999-2005), Täckholm (1974), Hassler (2004-2022), POWO (2022) | × | √ | × | ? |
| *Echinops taeckholmianus*Amin |  | 6 |  | √ | √ | × | √ |
| *Filago mareotica*Delile |  | 6 |  | √ | √ | × | √ |
| *Gnomophalium pulvinatum*(Delile) Greuter | Arabian Peninsula, Indian Subcontinent to South East. Tibet | 5, 6, 11, 12, 19 | Boulos (1999-2005), POWO (2022) | × | √ | × | × |
| *Helichrysum orientale*(L.) Gaertn. |  | 6 |  | √ | √ | × | √ |
| *Helichrysum stoechas*subsp. *barrelieri* (Ten.) Nyman | Arabian Peninsula | 6, 11 | POWO (2022) | √ | × | × | × |
| *Hyoseris radiata* subsp*. graeca*Halácsy |  | 6 |  | √ | √ | √ | √ |
| *Hyoseris scabra*L. |  | 6 |  | √ | × | √ | √ |
| *Ifloga spicata*subsp.*hadidii*(Fayed & Zareh) Greuter | Eastern desert, South Sinai | 11 | Boulos (1999-2005) | × | √ | × | ■ |
| *Iphiona mucronata*(Forssk.) Asch. & Schweinf. | Arabian Peninsula | 6, 11 | POWO (2022) | × | √ | × | × |
| *Jurinea staehelinae*(DC.) Boiss. | Not recorded in Egypt in Egyptian flora books or herbaria or literature, IR-TR region of Jordon, Lebanon, Syria and Palestine | 5, 6 | Boulos (1999-2005), Täckholm (1974), Hassler (2004-2022), POWO (2022) | × | √ | × | ? |
| *Leontodon tuberosus*L. | Sweden, Macedonia, EU-SR and IR-TR parts of Turkey | 2, 6 | JSTOR (2022), Hassler (2004-2022) | √ | √ | √ | × |
| *Mantisalca salmantica*(L.) Briq. & Cavill. | Macaronesia, Europe | 2, 6, 7 | POWO (2022), Euro+Med (2006) | √ | × | × | × |
| *Onopordum alexandrinum*Boiss. | West IR-TR, East SA-AR | 5, 11 | Feinbrun-Dothan (1978, 1986), Ahmed (2009) | √ | √ | × | × |
| *Onopordum carduiforme*Boiss. | Reported in Egypt as casual alien in Med-Checklist (2016) and Euro+Med (2006) in error | 6 | Boulos (1999-2005), El-Beheiry et al. (2020) | × | √ | × | ? |
| *Phagnalon rupestre*(L.) DC. | Iran and Arabian Peninsula. | 5, 6, 11 | POWO (2022) | √ | × | √ | × |
| *Picris amalecitana*(Boiss.) Eig | Not recorded in Egypt in Egyptian flora books or herbaria or literature | 6 | Boulos (1999-2005), Täckholm (1974) | × | √ | × | ? |
| *Picris asplenioides*L. | Arabian Peninsula | 6, 11 | POWO (2022) | × | √ | × | × |
| *Picris rhagadioloides*(L.) Desf. | Central Europe, not recorded in Egypt in Egyptian flora books | 2, 6 | POWO (2022), Boulos (1999-2005), Täckholm (1974) | × | √ | × | ? |
| *Picris sulphurea*Delile | Arabian Peninsula | 6, 11 | POWO (2022) | × | √ | × | × |
| *Pseudopodospermum undulatum* (Vahl) Zaika, Sukhor. & N.Kilian | Arabian Peninsula, not recorded in Egypt in Egyptian flora books | 6, 11 | POWO (2022), Boulos (1999-2005), Täckholm (1974) | × | √ | × | ? |
| *Reichardia picroides*(L.) Roth | Absent in Egypt but reported in error | 6 | Euro+Med (2006), Med-Checklist (2016), Boulos (1999-2005) | √ | × | √ | ? |
| *Scorzonera drarii*V.Tackh. | Isthmic desert | 6, 11 | Täckholm (1974) | × | √ | × | × |
| *Scorzoneroides hispidula*(Delile) Greuter & Talavera | Iran and Southwest Asia | 5, 6 | Boulos (1999-2005), Täckholm (1974), | × | √ | × | × |
| *Scorzoneroides simplex*(Viv.) Greuter & Talavera | Mauritania | 6, 12 | POWO (2022) | √ | √ | √ | × |
| *Senecio aegyptius* L. | Tropical Africa. | 6, 12 | POWO (2022) | √ | √ | × | × |
| *Senecio belbeysius*Delile | Nile Delta, Nile Valley | 6, 11 | Hassler (2004-2022), Boulos (1099-2005) | √ | √ | × | ■ |
| *Senecio glaucus* subsp.*glaucus* | Eastern Desert, Great Southwestern Desert | 6, 11 | Hassler (2004-2022), Boulos (1099-2005) | √ | √ | × | ■ |
| *Sonchus macrocarpus*Boulos & C.Jeffrey | Eastern desert | 6, 11 | El‐Khalafy et al. (2021), Boulos (1999-2005) | × | √ | √ | ■ |
| *Taraxacum minimum*(brig. ex Guss.) N.Terracc. |  | 6 |  | √ | √ | √ | √ |
| **Boraginaceae Juss.** | | | | | | | |
| *Alkanna tinctoria*subsp. *tinctoria* | Central Europe | 2, 6 | POWO (2022) | √ | × | √ | × |
| *Anchusa humilis*(Desf.) I.M.Johnst. | Chad, Mauritania | 6, 12 | POWO (2022) | √ | √ | × | × |
| *Buglossoides incrassata*(Guss.) | Canary Islands, central Europe, W. Iran. | 2, 5, 6, 7 | POWO (2022) | √ | √ | × | × |
| *Echiochilon fruticosum*Desf. | Arabia | 6,11 | POWO (2022), Boulos (1999-2005), Ahmed (2009) | × | √ | × | × |
| *Echium longifolium*Delile | Yemen, Ethiopia, Suadi Arabia | 6, 11, 12 | (GBIF (2022), Dubaie, and Al‐Khulaidi (1993), Boulos (1999-2005) | × | √ | × | × |
| *Heliotropium rotundifolium*Sieber ex | Deserts of Palestine , deserts of Egypt | 6, 11 | Danin and Fragman- Sapir (2016), Boulos (1999-2005), CAI | √ | √ | × | ■ |
| *Nonea vivianii*DC. | Wadi El-Arbaeen (south Sinai) | 6, 11 | CAIA | × | √ | × | ■ |
| *Podonosma galalensis*Schweinf. ex Boiss. | Deserts of Palestine , deserts of Egypt | 6, 11 | Danin and Fragman- Sapir (2016), Boulos (1999-2005), CAI | × | √ | × | ■ |
| *Trichodesma ehrenbergii*Schweinf. | Sudan and Arabian Peninsula. | 6, 11, 12 | POWO (2022) | × | √ | × | × |
| *Anchusa undulata* subsp. *hybrida* (Ten.) Cout. |  | 6 |  | √ | √ | × | √ |
| *Echium angustifolium* subsp. *sericeum* (Vahl) Klotz | Yemen, Arabia | 6, 11 | GBIF (2022), Dubaie and Al-Khulaidi (1993), Boulos (1999-2005) | × | √ | √ | × |
| *Echium angustifolium*Mill. subsp. *angustifolium* | Extends to SA-AR deserts of Egypt and Libya and IR-TR part of Turkey and Israel, and Turkey in Europe (EU-SR) | 2, 5, 6, 11 | Boulos (1999-2005), Euro+Med (2006), Hassler (2004-2022), GBIF (2022), African Plant Database (2022), Rabei and Elgamal (2021), Davis (1965-1985) | √ | √ | √ | ■ |
| *Echium glomeratum*Poir. | Russia, IR-TR part of Turkey (inner and north Anatolia), SA-AR central Syrian and Lebanon deserts | 3, 5, 6, 11 | GBIF (2022), Hassler (2004-2022), El-Husseini et al. (2008) | √ | √ | × | × |
| *Echium rubrum*Forssk. | Hungary, Ukraine, Georgia, Romania, Czechia, United Kingdom, Russia | 2, 3, 6 | GBIF (2022), JSTOR (2022) | √ | √ | √ | × |
| *Echium sabulicolum* var. *tenue* (Roth) Hadidy in Boulos | absent in Egypt but reported in error, Netherlands | 2, 6 | Med-Checklist (2016), POWO (2022), Hassler (2004-2022), GBIF (2022) | √ | √ | × | ? |
| *Heliotropium hirsutissimum*Grauer |  | 6 |  | √ | √ | √ | √ |
| **Brassicaceae Burnett** | | | | | | | |
| *Arabis verna*(L.) W.T.Aiton | Crimea, Russia | 3, 6 | POWO (2022), Hassler (2004-2022), | × | √ | × | × |
| *Biscutella didyma*var. *depressa*(Willd.) El Naggar | Austria, Bulgaria, Germany, Hungary, Switzerland | 2, 6 | POWO (2022) | × | √ | × | × |
| *Brassica deserti*Danin & Hedge | Gebel Igma, southern Sinai | 6, 11 | El-Khalafy et al. (2021) | √ | √ | × | ■ |
| *Crucihimalaya kneuckeri*(Bornm.) Al-Shehbaz, O'Kane & R.A.Price | Saudi Arabia | 6, 11 | POWO (2022) | × | √ | × | × |
| *Didesmus aegyptius*(L.) Desv. | Luxor, south Egypt | 6, 11 | GBIF (2022), Täckholm (1974) | √ | √ | √ | × |
| *Didesmus bipinnatus*(Desf.) DC. | Netherlands , Kuwait; Saudi Arabia | 2, 6, 11 | JSTOR (2022), Hassler (2004-2022) | √ | × | √ | × |
| *Diplotaxis muralis* subsp. *simplex*(Viv.) Jafri | North African deserts (SA-AR) | 6, 11 | African Plant Database (2022), GBIF (2022), Jafri and El-Gadi (1977-1988) | √ | √ | × | ■ |
| *Enarthrocarpus strangulatus*Boiss. | SA-AR, Belgium | 2, 6, 11 | Flowers in Israel (2005-2022), GBIF (2022) | √ | √ | × | × |
| *Erucaria microcarpa* Boiss. | SA-AR | 11 | Flowers in Israel (2005-2022), Danin and Fragman- Sapir (2016) | √ | √ | √ | × |
| *Lobularia arabica*(Boiss.) Muschl. | Mauritania, Saint Katherine and deserts of Palestine | 6, 11, 12 | Rabei and Elgamal (2021), Danin and Fragman- Sapir (2016), GBIF (2022), CAI, SCUI | √ | √ | × | × |
| *Matthiola longipetala* subsp.*bicornis*(Sm.) P.W.Ball | Germany, Canada, Sweden, USA, SA-AR region of Sinai | 2, 6, 8, 9, 10, 11 | GBIF (2022), Rabei and Elgamal (2021) | × | √ | × | × |
| *Matthiola longipetala* subsp.*hirta*(Conti) Greuter & Burdet | SA-AR region of Sinai | 6, 11 | Rabei and Elgamal (2021) | × | √ | × | ■ |
| *Nasturtiopsis coronopifolia* subsp. *arabica*(Boiss.) Greuter & Burdet | Deserts of Israel | 6, 11 | Flowers in Israel (2005-2022), Danin A and Fragman- Sapir O (2016) | × | √ | × | ■ |
| *Ochthodium aegyptiacum*(L.) DC. | absent in Egypt but reported in error | 6 | Med-Checklist (2016), Euro+Med (2006), GBIF (2022) | √ | √ | × | ? |
| *Pseuderucaria clavata*subsp.*clavata* | Deserts of Israel | 6, 11 | Flowers in Israel (2005-2022), Danin A and Fragman- Sapir O (2016) | × | √ | × | ■ |
| *Pseuderucaria teretifolia*(Desf.) O.E.Schulz | USA | 6, 8, 9, 10 | GBIF (2022) | × | √ | × | × |
| *Ricotia lunaria*(L.) DC. | South Sinai | 6, 11 | Täckholm (1974) | √ | √ | × | ■ |
| *Rorippa integrifolia*Boulos | Maghara mountain | 6, 11 | POWO (2022) | √ | √ | × | ■ |
| *Sinapis arvensis* subsp.*allionii*(Jacq.) Baillarg. | Recorded in UK, the Netherlands, Eretria, Denmark, Russia, Australia | 2, 3, 6, 34, 35, 36 | World Plants, Complete List, JSTOR (2022), GBIF (2022), El‐Khalafy et al. (2021) | √ | √ | √ | × |
| *Sisymbrium polyceratium* L. | Switzerland, Germany, USA | 2, 6, 8 | JSTOR (2022), POWO (2022), Hassler (2004-2022) | × | √ | × | × |
| *Zilla spinosa*subsp. *biparmata*(O.E.Schulz) Maire & Weiller | North Africa deserts | 6, 11 | CAI, Hassler (2004-2022) | √ | √ | × | ■ |
| **Campanulaceae Juss.** | | | | | | | |
| *Asyneuma rigidum*subsp.*sinai*(A.DC.) Damboldt | South Sinai mountains | 6, 11 | Täckholm (1974) | √ | √ | × | ■ |
| **Capparaceae Juss.** | | | | | | | |
| *Capparis spinosa* var. *inermis* Turra | Tanzania, W. Asia to India, Arabian Peninsula, W. Indian Ocean. | 6, 11, 15, 19 | POWO (2022), Ahmed (2009) | √ | × | × | × |
| *Capparis spinosa* var. *canescens*Coss. | Arabian Peninsula, West and Central Asia to India | 5, 6, 11, 19 | POWO (2022) | × | √ | × | × |
| **Caprifoliaceae Juss.** | | | | | | | |
| *Cephalaria syriaca*(L.) Schrad. ex Roem. & Schult. | Central Asia and Pakistan. | 5, 6 | POWO (2022) | × | √ | × | × |
| *Lomelosia aucheri*(Boiss.) Greuter & Burdet | Iraq, not recorded in Egyptian flora books | 5, 6 | POWO (2022), Täckholm (1974), Boulos (1099-2005) | × | √ | × | ? |
| *Lomelosia prolifera*(L.) Greuter & Burdet | Absent in Egyptian flora books and reported in Egypt in Med-checklist (2016) in error | 6 | POWO (2022), Dobignard and Chatelain (2012), Boulos (1999-2005), Täckholm (1974), Med-Checklist (2016) | × | √ | × | ? |
| *Pterocephalus arabicus*Boiss. | Central Sinai | 6, 11 | Hassler (2004-2022), Täckholm (1974) | √ | √ | × | ■ |
| *Pterocephalus sanctus*Decne. | Suadi Arabia | 6, 11 | POWO (2022) | × | √ | × | × |
| *Scabiosa eremophila*Boiss. | Extends to deserts recorded in eastern desert and deserts of Palestine | 6, 11 | Abd El-Ghani et al. (2017), Danin and Fragman- Sapir (2016) | √ | √ | × | ■ |
| *Valerianella petrovitchii*Asch. |  | 6 |  | √ | × | × | √ |
| **Caryophyllaceae Juss.** | | | | | | | |
| *Arenaria deflexa*Decne. | Arabian Peninsula | 6, 11 | POWO (2022) | √ | √ | √ | × |
| *Bolanthus hirsutus*(Labill.) Barkoudah | South Sinai mountains | 6, 11 | Täckholm (1974) | √ | √ | × | ■ |
| *Dianthus guessfeldtianus*Muschl. | Galala desert | 11 | POWO (2022), Boulos (1999-2005) | × | √ | × | ■ |
| *Dianthus sinaicus*Boiss. | Arabian Peninsula | 6, 11 | POWO (2022) | × | √ | × | × |
| *Gypsophila capillaris*(Forssk.) C.Chr. | Iran, Iraq, Kuwait, Saudi Arabia | 5, 6, 11 | POWO (2022), Boulos (1999-2005) | × | √ | × | × |
| *Gypsophila coelesyriaca*(Boiss. & Hausskn.) F.N.Williams | Iran, Iraq | 5, 6 | POWO (2022) | × | √ | × | × |
| *Herniaria cyrenaica*F.Herm. |  | 6 |  | √ | √ | × | √ |
| *Minuartia mediterranea*(Ledeb. ex Link) K.Malý | Mediterranean, slightly extending to adjacent regions (European Turkey, Switzerland, Iran), doubtfully present in Egypt | 2, 5, 6 | Zohary (1966, 1987), Hassler (2004-2022), GBIF (2022), JSTOR (2022) | √ | √ | × | ? |
| *Paronychia arabica* subsp*. longiseta*Batt. | Sahara to Iraq and Arabian Peninsula | 5, 6, 11, 12 | POWO (2022), Boulos (1999-2005) | × | √ | × | × |
| *Paronychia capitata*(L.) Lam. | Canary Islands, Yemen, Eritrea, North African deserts of Morocco and Algeria | 6, 7, 11, 12 | POWO (2022), Hassler (2004-2022), eflora Maghreb (2021), African plant database (2022) | √ | √ | √ | × |
| *Paronychia sinaica*Fresen. | Suadi Arabia | 6, 11 | POWO (2022), Boulos (1999-2005) | × | √ | × | × |
| *Petrorhagia arabica* (Boiss.) P.W.Ball & Heywood | Central and South Sinai, Deserts of Israel | 6, 11 | CAI, Hassler (2004-2022), Täckholm (1974) | √ | √ | × | ■ |
| *Petrorhagia illyrica* subsp. *angustifolia*(Poir.) P.W.Ball & Heywood | Turkmenistan, Romania, North African deserts of Morocco | 2, 5, 6, 11 | JSTOR (2022), GBIF (2022), eflora Maghreb (2021), African plant database (2022) | √ | √ | √ | × |
| *Polycarpon succulentum*J.Gay | Iraq, Arabian Peninsula. | 5, 6, 11 | POWO (2022), Boulos (1999-2005) | × | √ | × | × |
| *Silene biappendiculata*Ehrh. ex Rohrb. | South Sinai | 11 | POWO (2022), Täckholm (1974), Boulos (1999–2009) | × | √ | × | ■ |
| *Silene fruticosa*L. |  | 6 |  | √ | √ | √ | √ |
| *Silene leucophylla*Boiss. | Saint Catherine, South Sinai | 6, 11 | POWO (2022), CAI | √ | √ | × | ■ |
| *Silene linearis*Decne. | Arabian Peninsula | 6, 11 | POWO (2022), Boulos (1999-2005) | × | √ | × | × |
| *Silene palaestina*Boiss. | Central Sinai (Isthmic desert) | 6, 11 | Täckholm (1974) | √ | √ | × | ■ |
| *Silene pseudoatocion*Desf. | Victoria, Norway, Sweden, Germany | 2, 6, 34 | GBIF (2022), VicFlora (2022) | √ | √ | × | × |
| *Silene schimperiana*Boiss. | Yemen, Arabian Peninsula | 6, 11 | POWO (2022), Hassler (2004-2022), GBIF (2022) | √ | √ | × | × |
| *Silene succulenta*subsp*. succulenta* Forssk. | Saudi Arabia, Transcaucasus | 2, 6, 11 | POWO (2022) | √ | × | √ | × |
| *Silene vivianii*subsp.*vivianii* | Arabia, Iraq | 5, 6, 11 | POWO (2022), Boulos (1999-2005) | × | √ | × | × |
| **Cistaceae Juss.** | | | | | | | |
| *Fumana thymifolia*(L.) Webb | Krym, Isthmic desert of Sinai | 5, 6, 11 | POWO (2022), Täckholm (1974) | √ | √ | √ | × |
| *Helianthemum crassifolium*subsp.*sphaerocalyx*(Gauba & Janch.) Maire | | 6 |  | √ | √ | × | √ |
| *Helianthemum kahiricum*Delile | Gulf States, Iraq, Kuwait, Oman, Saudi Arabia | 5, 6, 11 | POWO (2022), Boulos (1999-2005), Ahmed (2009) | × | √ | × | × |
| *Helianthemum schweinfurthii* Grosser | Gebel Shalufa (eastern desert) | 6, 11 | POWO (2022), Boulos (1999-2005) | × | √ | × | ■ |
| *Helianthemum vesicarium*Boiss. | West IR-TR, with extensions to the adjacent Mediterranean coastland | 5, 6 | Zohary (1966, 1987), Ahmed 2009 | √ | × | × | ■ |
| **Convolvulaceae Juss.** | | | | | | | |
| *Convolvulus cneorum*L. | New Zealand, absent in Egypt and reported in Egypt in Med-Checklist (2016) in error | 6, 37 | Boulos (1999-2005), Täckholm (1974), POWO (2022) | × | √ | × | ? |
| *Convolvulus dorycnium*L. | Central Asia | 5, 6 | POWO (2022) | √ | × | × | × |
| *Convolvulus humilis*Jacq. |  |  |  | √ | √ | √ | √ |
| *Convolvulus oleifolius*Desr. | Liberia , Inland areas of Sinai | 6, 11, 14 | GBIF (2022), Kamel et al. (2008), CAI | √ | √ | √ | × |
| *Convolvulus palaestinus*Boiss. | South Sinai | 6, 11 | El-Husseini et al. (2008) | √ | √ | × | ■ |
| *Convolvulus prostratus*Forssk. | Sahara, Arabian Peninsula to India | 6, 11, 12, 19 | POWO (2022), Boulos (1999-2005) | × | √ | × | × |
| *Convolvulus secundus*Desr. | absent in Egypt and reported in Egypt by Täckholm (1974) in error | 6 | Boulos (1999-2005), POWO (2022), Med-Checklist (2016), Euro+Med (2006) | √ | √ | × | ? |
| *Convolvulus spicatus*Peter ex Hallier f. | Arabian Peninsula | 6, 11 | POWO (2022) | √ | √ | × | × |
| **Crassulaceae J.St.-Hil.** | | | | | | | |
| *Rosularia lineata*(Boiss.) A.Berger | Deserts of South Sinai, Syria and Israel | 6, 11 | Hassler (2004-2022), CAI, CAIM | √ | √ | × | ■ |
| **Cucurbitaceae Juss.** | | | | | | | |
| *Bryonia cretica*L. | Belgium, Bulgaria, Czechoslovakia, Germany, Great Britain, Hungary, Kazakhstan, Netherlands, Sardegna, Sicilia, Switzerland, Tadzhikistan, Uzbekistan | 2, 5, 6 | POWO (2022), GBIF (2022), JSTOR (2022) | √ | √ | √ | × |
| *Bryonia syriaca*Boiss. | South Sinai | 6, 11 | Hassler (2004-2022), Täckholm (1974) | √ | √ | × | ■ |
| **Elatinaceae Dumort.** | | | | | | | |
| *Elatine macropoda*Guss. | Germany, Canada , Siberia, Jbel Druze of Syria , El-Khanka, Nile Valley, South Egypt | 2, 5, 6, 11 | GBIF (2022), CAI, Boulos (1999-2005), Hassler (2004-2022) | × | √ | × | × |
| **Ephedraceae Dumort.** | | | | | | | |
| *Ephedra foeminea*Forssk. | Tropical Africa, Arabian Peninsula | 6, 11, 12 | POWO (2022) | × | √ | × | × |
| *Ephedra pachyclada* subsp.*sinaica* (Riedl) Freitag & Maier-St. | Arabian Peninsula | 6, 11 | POWO (2022) | × | √ | × | × |
| **Euphorbiaceae Juss.** | | | | | | | |
| *Euphorbia arguta*Banks & Sol. | Sudan, Nile Valley | 6, 11, 12 | POWO (2022), CAI | √ | √ | × | × |
| *Euphorbia chamaepeplus*Boiss. & Gaill. | Iran, Iraq & Arabian Peninsula. | 5, 6, 11 | POWO (2022) | × | √ | × | × |
| *Euphorbia dendroides*L. | Canary islands, United Kingdom | 2, 6, 7 | POWO (2022), GBIF (2022), JSTOR (2022) | √ | √ | √ | × |
| *Euphorbia hierosolymitana*Boiss. | West Transcaucasus. | 2, 6 | POWO (2022) | √ | √ | × | × |
| *Euphorbia obovata* Decne. | South Sinai | 6, 11 | POWO (2022), Hassler (2004-2022), Täckholm (1974) | √ | √ | × | ■ |
| *Euphorbia oxyodonta*Boiss. | Iraq and IR-TR Jbel Druze (Syria), and Anatolia (Turkey) | 5, 6 | GBIF (2022), Hassler (2004-2022) | √ | √ | × | × |
| *Euphorbia parvula*Delile |  | 6 |  | √ | √ | × | √ |
| *Euphorbia pterococca*Brot. | Canary islands | 6, 7 | POWO (2022) | √ | × | × | × |
| *Euphorbia punctata*Delile | Azerbajan, Ecuador | 5, 6, 30 | GBIF (2022), JSTOR (2022) | √ | √ | √ | × |
| *Euphorbia terracina*L. | Macaronesia, Hungary, Arabian Peninsula. | 2, 6, 7, 11 | POWO (2022) | √ | × | √ | × |
| **Fabaceae Lindl.** | | | | | | | |
| *Anthyllis vulneraria* subsp. *maura*(Beck) Maire |  | 6 |  | √ | √ | √ | √ |
| *Argyrolobium uniflorum*(Decne.) Jaub. & Spach | Mauritania, Pakistan, Saudi Arabia | 5, 6, 11, 12 | POWO (2022),Boulos (1999-2005) | × | √ | × | × |
| *Astracantha echinus*(DC.) Podlech | Suadi Arabia | 6, 11 | POWO (2022), Hassler (2004-2022) | √ | √ | × | × |
| *Astragalus amalecitanus*Boiss. | Saint Katherine protectorate, South Sinai | 6, 11 | Rabei and Elgamal (2021) | √ | √ | × | ■ |
| *Astragalus asterias* subsp. *radiatus*(Batt.) Greuter | Iran, Iraq, Pakistan, Saudi Arabia, Transcaucasus | 2, 5, 6, 11 | POWO (2022),Boulos (1999-2005), Ahmed (2009) | × | √ | × | × |
| *Astragalus camelorum*Barbey | Isthmic desert, Sinai | 6, 11 | CAI, Täckholm (1974) | √ | √ | × | ■ |
| *Astragalus cretaceus*Boiss. & Kotschy | Iraq | 5, 6 | POWO (2022), National Registry for Egyptian Herbaria (2022) | √ | × | × | × |
| *Astragalus fresenii*Decne. | South Sinai | 6, 11 | CAI, Täckholm (1974) | √ | √ | × | ■ |
| *Astragalus fruticosus*Forssk. | Arabian Peninsula | 6, 11 | POWO (2022) | √ | √ | × | × |
| *Astragalus intercedens*Sam. ex Rech.f. | Suadi Arabia | 6, 11 | POWO (2022),Hassler (2004-2022) | √ | √ | × | × |
| *Astragalus kralikii*Coss. ex Batt. | SA-AR | 11 | Jafri and El-Gadi (1977-1988) | √ | √ | × | × |
| *Astragalus macrocarpus* subsp.*macrocarpus* | Isthmic desert, Sinai | 6, 11 | Täckholm (1974) | √ | √ | × | ■ |
| *Astragalus mareoticus*Delile | Canary islands, Arabian Peninsula | 6, 7, 11 | POWO (2022) | √ | × | × | × |
| *Astragalus palaestinus*Eig | El-Bustan, South Sinai | 6, 11 | Täckholm (1974) | √ | √ | × | ■ |
| *Astragalus peregrinus*Vahl | Arabian Peninsula | 6, 11 | POWO (2022) | √ | √ | × | × |
| *Astragalus sanctus*Boiss. | Isthmic desert, Sinai | 6, 11 | Täckholm (1974) | √ | √ | × | ■ |
| *Astragalus sinaicus*Boiss. | Arabian Peninsula | 6, 11 | POWO (2022), GBIF (2022), Med-Checklist (2016) + Euro+Med (2006) | √ | √ | × | × |
| *Astragalus trigonus*DC. | Chad, Mali, Mauritania, Niger, Sudan | 6, 12 | POWO (2022),GBIF (2022) | √ | √ | × | × |
| *Astragalus trimestris*L. | SA-AR with extensions into the Mediterranean coastal plain | 6, 11 | Zohary (1966, 1987) | √ | √ | × | ■ |
| *Bituminaria flaccida*(Nábelek) Greuter | Suadi Arabia | 6, 11 | POWO (2022), Hassler (2004-2022) | × | √ | × | × |
| *Ceratonia siliqua* L. | Iran | 5, 6 | POWO (2022), Hassler (2004-2022) | √ | √ | × | × |
| *Colutea istria*Mill. | Irano-Turanian | 5 | Flowers in Israel (2022) | √ | √ | × | × |
| *Coronilla repanda*(Poir.) Guss. |  | 6 |  | √ | √ | × | √ |
| *Ebenus armitagei*Schweinf. & Taub. |  | 6 |  | √ | √ | √ | √ |
| *Hedysarum coronarium* L. | Australia and New Zealand | 34, 35, 36, 37 | Euro+Med (2006), GBIF (2022) | √ | √ | √ | × |
| *Hedysarum spinosissimum* L. |  | 6 |  | √ | √ | √ | √ |
| *Hippocrepis ciliata*Willd. | Absent in Egypt but reported in Täckholm (1974) error, Ukraine | 5, 6 | Euro+Med (2006), Med-Checklist (2016), Boulos (1999-2005), GBIF (2022) | × | √ | × | ? |
| *Hippocrepis cyclocarpa*Murb. | Arabian Peninsula | 6, 11 | POWO (2022) | √ | √ | × | × |
| *Lathyrus hierosolymitanus*Boiss. | Afghanistan, Iraq, Iran to central Asia | 5, 6 | GBIF (2022),Boulos (1999-2005) | × | √ | × | × |
| *Lathyrus marmoratus*Boiss. & Blanche |  | 6 |  | √ | √ | √ | √ |
| *Lathyrus setifolius*L. | Canary islands | 6,7 | POWO (2022) | √ | × | × | × |
| *Lotus tetragonolobus*L. | Netherlands, Ukraine, Canary Islands, New South Wales, Victoria , Georgia, China | 2, 4, 6, 7 | JSTOR (2022), POWO (2022), Hassler (2004-2022) | √ | × | √ | × |
| *Lotus creticus*L. | Canary Islands | 6, 7 | POWO (2022) | √ | × | √ | × |
| *Lotus cytisoides*L. |  | 6 |  | √ | √ | √ | √ |
| *Lotus edulis*L. | Netherlands, extends to EU-SR, IR-TR of Turkey | 2, 5, 6 | JSTOR (2022), Euro+Med (2006), Hassler (2004-2022) | √ | √ | × | × |
| *Lotus hebranicus*Hochst. ex Brand | Eritrea, Sudan | 6, 12 | POWO (2022), Boulos (1999-2005) | × | √ | × | × |
| *Lotus longisiliquosus*R.Roem. | Absent in Egypt but reported in error | 6 | Boulos (1999-2005), POWO (2022), GBIF (2022), Hassler (2004-2022) | × | √ | × | ? |
| *Lotus peregrinus*L. | Netherlands, extends to IR-TR of Turkey (Anatolia) and Syria, SA-AR desert Oases and St. Catherine mountains in Egypt | 5, 6, 11 | JSTOT, Euro+Med (2006), Hassler (2004-2022), Rabei and Elgamal (2021) | √ | √ | √ | × |
| *Lotus polyphyllos*Clarke |  | 6 |  | √ | √ | √ | √ |
| *Lupinus digitatus*Forssk. | Senegal, Western Sahara | 6, 12 | POWO (2022) | × | √ | × | × |
| *Lupinus palaestinus*Boiss. | Central Sinai | 6, 11 | POWO (2022), Hassler (2004-2022), Täckholm (1974) | √ | √ | × | ■ |
| *Medicago granadensis*Willd. | Mediterranean, elsewhere adventive, Afghanistan | 5, 6 | Zohary (1966, 1987). GBIF (2022) | √ | √ | × | × |
| *Medicago hypogaea*E. Small | Iraq | 5, 6 | POWO (2022), WCSP (2022) | √ | √ | √ | × |
| *Medicago polyceratia*(L.) Trautv. | Mauritania | 6, 12 | POWO (2022) | √ | √ | × | × |
| *Melilotus elegans*Ser. | Djibouti, Ethiopia | 6, 12 | POWO (2022) | √ | × | × | × |
| *Melilotus segetalis*(Brot.) Ser. | Liberia | 6, 14 | POWO (2022) | √ | √ | × | × |
| *Melilotus serratifolius*Täckh. & Boulos | Dakhla oasis | 6, 11 | POWO (2022), Boulos (1999-2005) | × | √ | × | ■ |
| *Ononis natrix* subsp. *stenophylla* Boiss.) Sirj. | Mediterranean with extensions into adjacent territories of the SA-AR region | 6, 11 | Zohary (1966, 1987) | √ | √ | × | ■ |
| *Ononis vaginalis*Vahl | W. IR-TR with extensions into SA-AR | 5, 11 | Zohary (1966, 1987) | √ | √ | × | × |
| *Ononis variegata*L. | Canary Islands | 6, 7 | POWO (2022), GBIF (2022) | √ | √ | × | × |
| *Pisum fulvum*Sm. | Germany, United Kingdom, Russia | 2, 3, 6 | Hassler (2004-2022), GBIF (2022) herbarium sheets | √ | √ | × | × |
| *Retama monosperma* subsp. *bovei*(Spach) Maire | Sahara of Morocco, absent in Egypt | 6, 11 | Euro+Med (2006) + Ahmed (2009), eflora Maghreb (2021), POWO (2022), GBIF (2022), WSCSP (2022) | √ | × | × | ■ |
| *Retama raetam*subsp.*raetam* | Saudi Arabia, Sudan, Western Sahara | 6, 11, 12 | POWO (2022) | √ | × | × | × |
| *Trifolium argutum*Sol. |  | 6 |  | √ | √ | √ | √ |
| *Trifolium constantinopolitanum*Ser. | Great Britain, Ireland, Bulgaria, Belgium, absent in Egypt and reported in Egypt in Med-Checklist (2016) in error | 2, 6 | Boulos (1999-2005), POWO (2022), GBIF (2022), Hassler (2004-2022) | × | √ | × | ? |
| *Trifolium dichroanthum*Boiss. | Armenia, USA | 2, 6, 8, 9, 10 | GBIF (2022), JSTOR (2022) | √ | √ | × | × |
| *Trifolium glanduliferum*var. *nervulosum*(Boiss. & Heldr.) Zohary | North Albania, European Turkey (Euro-Siberian) | 2, 6 | POWO (2022), Hassler (2004-2022) | √ | √ | × | × |
| *Trifolium philistaeum*Zohary | Isthmic desert, Sinai | 6, 11 | Täckholm (1974) | √ | √ | × | ■ |
| *Trifolium purpureum* var.*desvauxii*(Boiss. & Blanche) Post | West Asia, Australia, United states of America | 6, 8, 9, 10, 11, 34, 35, 36 | GBIF (2022) | × | √ | × | × |
| *Trigonella arabica*Delile | SA-AR | 11 | Danin and Fragman- Sapir (2016), Flowers in Israel (2005-2022) | √ | √ | × | × |
| *Trigonella berythea*Boiss. & Blanche |  | 6 |  | √ | √ | √ | √ |
| *Trigonella cylindracea*Desv. | Iran, Suadi Arabia | 5, 6, 11 | POWO (2022) | × | √ | × | × |
| *Trigonella maritima* Poir. | Mediterranean, extending to adjacent deserts | 6, 11 | Zohary (1966, 1987) | √ | √ | √ | ■ |
| *Trigonella media*Delile ex Urb. | Cairo (eastern desert) | 6, 11 | POWO (2022),Boulos (1999-2005) | × | √ | × | ■ |
| *Trigonella occulta*Delile ex Ser. | India, Pakistan, Bhutan and Nepal | 4, 5, 6, 19 | IPNI (2022), GBIF (2022) | √ | √ | √ | × |
| *Trigonella schlumbergeri*Boiss. | Deserts of Syria, Israel and Central Sinai | 6, 11 | Hassler (2004-2022) | √ | √ | × | ■ |
| *Tripodion tetraphyllum*(L.) Fourr. | Netherlands, IR-TR Anatolia | 2, 5, 6 | JSTOR (2022), Hassler (2004-2022) | √ | √ | √ | × |
| *Vicia articulata*Hornem. | Iraq | 5, 6 | POWO (2022) | √ | × | √ | × |
| *Vicia ervilia*(L.) Willd. | Central Asia | 5, 6 | POWO (2022) | √ | × | √ | × |
| *Vicia sinaica*Boulos |  | 6 |  | √ | √ | × | √ |
| *Vicia villosa* subsp*. microphylla*(d'Urv.) P.W.Ball | Canary Islands, Europe to Central Asia and Afghanistan | 2, 5, 6, 7 | Boulos (1999-2005), POWO (2022) | × | √ | × | × |
| **Gentianaceae Juss.** | | | | | | | |
| *Centaurium malzacianum*Maire | Saudi Arabia | 6, 11 | POWO (2022) | × | √ | × | × |
| **Geraniaceae Juss.** | | | | | | | |
| *Erodium arborescens* (Desf.) Willd. | Deserts of Egypt and Palestine | 6, 11 | CAI, CAIRC, Danin and Fragman- Sapir (2016) | × | √ | × | ■ |
| *Erodium chium*(L.) Willd. | Western Sahara and Eritrea | 6, 12 | POWO (2022) | √ | × | √ | × |
| **Hypericaceae Juss.** | | | | | | | |
| *Hypericum lanuginosum*Lam. | South Sinai, Anatolia of Turkey and Central Syrian deserts | 5, 6, 11 | Hassler (2004-2022), Täckholm (1974) | √ | √ | × | ■ |
| *Hypericum sinaicum*Hochst. ex Boiss. | Saudi Arabia, South Sinai | 6, 11 | POWO (2022), Hassler (2004-2022), Täckholm (1974) | × | √ | × | × |
| **Iridaceae Juss.** | | | | | | | |
| *Moraea mediterranea*Goldblatt | SA-AR regions of Palestine (Negev Desert), Great Southwestern Desert and central Sinai Peninsula of Egypt | 6, 11 | Pokorný and Pokorná (2009-2010), Danin and Fragman- Sapir (2016), Flowers in Israel (2005-2022), Hassler (2004-2022) | √ | × | × | ■ |
| **Lamiaceae Martinov** | | | | | | | |
| *Pseudodictamnus mediterraneus*Salmaki & Siadati |  | 6 |  | √ | × | × | √ |
| *Phlomis floccosa*D.Don | Russia | 3, 6 | GBIF (2022) herbarium sheet | × | √ | √ | × |
| *Prasium majus*L. | Macaronesia | 6, 7 | Euro+Med (2006), POWO (2022) | √ | × | √ | × |
| *Teucrium brevifolium*Schreb. |  | 6 |  | √ | √ | × | √ |
| *Thymbra capitata*(L.) Cav. |  | 6 |  | √ | √ | √ | √ |
| *Ballota kaiseri*Täckh. | South Sinai | 6, 11 | Hassler (2004-2022), Täckholm (1974) | √ | √ | × | ■ |
| *Ballota saxatilis*subsp.*saxatilis* | Saudi Arabia, South Sinai | 6, 11 | POWO (2022), World Plants (Complete List), Täckholm (1974) | √ | √ | × | × |
| *Ballota undulata*(Sieber ex Fresen.) Benth. | Saudi Arabia, South Sinai | 6, 11 | POWO (2022), Hassler (2004-2022), Täckholm (1974) | × | √ | × | × |
| *Marrubium alysson*L. | Deserts of Egypt and Palestine , Netherlands | 2, 6, 11 | JSTOR (2022), Danin and Fragman- Sapir (2016), Hassler (2004-2022) | √ | √ | × | × |
| *Micromeria graeca*(L.) Benth. ex Rchb. | Absent in Egyptian flora books and reported in Egypt in Med-checklist (2016) in error | 6 | Med-Checklist (2016), Boulos (1999-2005), Täckholm (1974) | × | √ | × | ? |
| *Micromeria microphylla*(d'Urv.) Benth. | USA, absent in Egyptian flora book and reported in Egypt in Med-checklist (2016) in error | 6, 8 | Med-Checklist (2016), Boulos (1999-2005), Täckholm (1974), GBIF (2022) | × | √ | × | ? |
| *Micromeria nervosa*(Desf.) Benth. | SA-AR region in south Sinai (Egypt) and IR-TR Anatolia (Turkey) | 5, 6, 11 | Hassler (2004-2022), Täckholm (1974), Flora of Turkey (2022), Davis (1965-1985). | √ | √ | √ | ■ |
| *Micromeria serbaliana*Danin & Hedge | Gebel Serbal, Saint Catherine, South Sinai | 6, 11 | Boulos (1999-2005), POWO (2022) | × | √ | × | ■ |
| *Nepeta septemcrenata*Ehrenb. ex Benth. | Iran, Suadi Arabia | 5, 6, 11 | GBIF (2022), JSTOR (2022) | × | √ | × | × |
| *Origanum isthmicum*Danin | Halal mountain, Central Sinai | 6, 11 | CAI, POWO (2022) | √ | √ | × | ■ |
| *Origanum syriacum* L. subsp. *sinaicum* | South Sinai | 6, 11 | Hassler (2004-2022), Täckholm (1974) | √ | √ | × | ■ |
| *Origanum syriacum*subsp.*syriacum* | Saudi Arabia, not recorded in Egyptian flora books and recorded in Egypt Med-Checklist (2016) in error | 6, 11 | Boulos, Täckholm (1974), POWO (2022), Hassler (2004-2022) | × | √ | × | ? |
| *Phlomis fruticosa*L. | Transcaucasus, not recorded in Egyptian flora books and recorded in Egypt Med-Checklist (2016) in error | 2, 6 | Boulos (1999-2005), Täckholm (1974), POWO (2022) | × | √ | × | ? |
| *Pseudodictamnus damascenus (*Boiss.) Salmaki & Siadati | Deserts of Egypt and Syria | 6, 11 | CAIM, TANE, Hassler (2004-2022) | × | √ | × | ■ |
| *Salvia dominica*L. | Arabian Peninsula. | 6, 11 | POWO (2022) | √ | √ | × | × |
| *Satureja cuneifolia*Ten. | Iraq, absent in Egyptian flora book and reported in Egypt in Med-checklist (2016) in error | 5, 6 | Täckholm (1974), Boulos (1999-2005), POWO (2022) | × | √ | × | ? |
| *Stachys aegyptiaca*Pers. | Saudi Arabia | 6, 11 | POWO (2022) | × | √ | × | × |
| *Teucrium leucocladum*Boiss. | Saudi Arabia | 6, 11 | POWO (2022) | × | √ | × | × |
| *Thymus bovei*Benth. | Deserts of Egypt, Arabia | 6, 11 | CAI, CAIRC, GBIF (2022), Boulos (1999-2005) | × | √ | × | × |
| *Thymus decussatus*Benth. | Suadi Arabia | 6, 11 | POWO (2022), Hassler (2004-2022), Boulos (1999-2005) | × | √ | × | × |
| **Linaceae DC. ex Perleb** | | | | | | | |
| *Linum decumbens*Desf. | Canary islands | 6, 7 | POWO (2022) | √ | × | × | × |
| **Malvaceae Juss.** | | | | | | | |
| *Alcea acaulis*(Cav.) Alef. | Saint Catherine | 6, 11 | Rabei and Elgamal (2021) | √ | √ | × | ■ |
| *Alcea apterocarpa*(Fenzl) Boiss. | South Sinai | 6, 11 | Täckholm (1974) | √ | √ | × | ■ |
| **Molluginaceae Bartl.** | | | | | | | |
| *Glinus runkewitzii*Täckh. & Boulos | Luxor, south Egypt | 6, 11 | Boulos (1999-2005) | × | √ | × | ■ |
| **Oleaceae Hoffmanns. & Link** | | | | | | | |
| *Olea europaea* L. subsp*. europaea* var. *sylvestris* | Western desert in Egypt | 6, 11 | POWO (2022), Boulos (1999-2005), CAI | √ | × | × | ■ |
| **Orobanchaceae Vent.** | | | | | | | |
| *Orobanche minor* var.*grisebachii* (Reut.) Hadidy | Saint Catherine | 6, 11 | Rabei and Elgamal (2021) | √ | √ | × | ■ |
| *Orobanche ramosa* L. var. *schweinfurthii* (Beck) Hadidy | Nile islands at Beni-Suef , middle Egypt | 6, 11 | Amer et al. (2015) | × | √ | √ | ■ |
| **Papaveraceae Juss.** | | | | | | | |
| *Fumaria gaillardotii*Boiss. |  | 6 |  | √ | √ | √ | √ |
| *Fumaria judaica*subsp.*judaica* |  | 6 |  | √ | √ | √ | √ |
| *Fumaria microstachys*Kralik ex Hausskn. |  | 6 |  | √ | √ | √ | √ |
| *Hypecoum aegyptiacum*(Forssk.) Asch. & Schweinf. | South Egypt | 6, 11 | GBIF (2022) | √ | √ | × | ■ |
| *Hypecoum aequilobum*Viv. | Isthmic desert of Sinai | 6, 11 |  | × | √ | × | ■ |
| *Hypecoum imberbe*Sm. | Transcaucasus, Iraq | 2, 5, 6 | POWO (2022) | √ | √ | × | × |
| *Hypecoum littorale*Wulfen | Iraq, Kuwait, Saudi Arabia | 5, 6, 11 | Boulos (1999-2005), POWO (2022) | × | √ | × | × |
| *Hypecoum procumbens*subsp.*procumbens* | Iraq | 5, 6 | Boulos (1999-2005), POWO (2022) | × | √ | × | × |
| *Papaver humile*Fedde | Deserts of Egypt and Israel SA-AR | 6, 11 | Hassler (2004-2022), Flowers in Israel (2005-2022) | √ | √ | × | ■ |
| **Plantaginaceae Juss.** | | | | | | | |
| *Linaria joppensis*Bornm. |  | 6 |  | √ | √ | × | √ |
| *Plantago albicans*L. | Canary Islands, Mauritania, Iran, NE. Tropical Africa, Arabian Peninsula. | 5, 6, 7, 11, 12 | POWO (2022) | √ | × | × | × |
| *Plantago crassifolia*Forssk. | South Africa, USA, Canada | 2, 6, 8, 9, 10, 16 | JSTOR (2022), GBIF (2022), SANBI (2010-2012), Tropicos (2022) | √ | × | √ | × |
| *Plantago crypsoides*Boiss. | SA-AR region of Egypt (central Sinai) and deserts of Israel, Suadi Arabia, Bahrain, Kuwait, Iran | 5, 6, 11 | GBIF (2022), Hassler (2004-2022) | × | √ | × | × |
| *Plantago macrorhiza*Poir. | Absent in Egypt but reported in error | 6 | Med-Checklist (2016), Euro+Med (2006), African Plant Database (2022) | √ | × | × | × |
| *Plantago phaeostoma*Boiss. & Heldr. | Canary Islands, Deserts of Egypt, central Sinai and deserts of Israel | 6, 7, 11 | GBIF (2022), Hassler (2004-2022) | × | √ | × | × |
| *Plantago sinaica*(Barnéoud) Decne. | South Sinai | 6, 11 | Hassler (2004-2022), Täckholm (1974) | √ | √ | × | × |
| *Plantago squarrosa*Murray | SA-AR region in central Sinai and eastern desert of Egypt, and IR-TR Anatolia (Turkey), USA | 5, 6, 8, 9, 10, 11 | JSTOR (2022), Boulos (1999-2005), Hassler (2004-2022) | √ | √ | √ | ■ |
| *Veronica syriaca*Roem. & Schult. |  | 6 |  | √ | × | × | √ |
| **Plumbaginaceae Juss.** | | | | | | | |
| *Limoniastrum guyonianum*Durieu ex Boiss. | South Morocco, South Algeria | 6, 11 | GBIF (2022), Hassler (2004-2022) | √ | √ | × | × |
| *Limoniastrum monopetalum*(L.) Boiss. | Mauritania, Canary Islands | 6, 7, 12 | JSTOR (2022), Hassler (2004-2022) | √ | √ | √ | × |
| *Limonium*  (L.) Mill. *sinuatum*subsp.*romanum*Täckh. & Boulos |  | 6 |  | √ | √ | √ | √ |
| *Limonium* (L.) Mill. *sinuatum*subsp.*Bonduellei* (Lestib.) Sauvage & Vindt | Mauritania, Chad | 6, 12 | POWO (2022) | √ | × | √ | × |
| *Limonium* (L.) Mill. *sinuatum*subsp.*sinuatum* | West Sahara and West Caucasus | 2, 6, 12 | POWO (2022) | √ | × | √ | × |
| *Limonium avei*(De Not.) Brullo & Erben | Absent in the Egyptian flora books and reported in Egypt in Med-checklist (2016) and Euro+Med (2006) in error | 6 | Täckholm (1974), Boulos (1999-2005), Hassler (2004-2022) | × | √ | × | ? |
| *Limonium echioides* (L.) Mill. |  | 6 |  | √ | √ | √ | √ |
| *Limonium narbonense*Mill. | Euro Siberian Azores Islands | 2, 6 | Hassler (2004-2022), GBIF (2022) | √ | √ | √ | × |
| *Limonium sibthorpianum*(Guss.) Kuntze | Absent in the Egyptian flora books and reported in Med-Checklist and Euro+Med (2006) in error | 6 | POWO (2022), Täckholm (1974), Boulos (1999-2005) | × | √ | × | ? |
| *Limonium tubiflorum*var.  *Tubiflorum* | Extends to the Libyan desert (DI) | 6, 11 | CAI, Boulos (1999-2005) | × | √ | × | ■ |
| *Limonium tubiflorum*var. *zanonii* (Pamp.) Maire | Extends to the Libyan desert (DI) | 6, 11 | CAI, Boulos (1999-2005) | × | √ | × | ■ |
| **Poaceae Barnhart** | | | | | | | |
| *Aegilops longissima*Schweinf. & Muschl. | East Mediterranean extending into SA-AR | 6, 11 | Feinbrun-Dothan (1978, 1986) | √ | × | × | ■ |
| *Avena longiglumis*Durieu | SA-AR | 11 | Feinbrun-Dothan (1978, 1986) | √ | × | × | × |
| *Cutandia maritima*(L.) Barbey | Canary Islands | 6, 7 | POWO (2022) | √ | × | √ | × |
| *Cynosurus coloratus*Lehm. ex Steud. |  | 6 |  | √ | × | × | √ |
| *Desmazeria philistaea*(Boiss.) H.Scholz |  | 6 |  | √ | √ | √ | √ |
| *Holcus annuus*Salzm. ex C.A.Mey. | Transcaucasus | 2, 6 | Euro+Med (2006), POWO (2022) | √ | × | × | × |
| *Lagurus ovatus*L. | Macaronesia, Arabian Peninsula. | 6, 7, 11 | POWO (2022), Euro+Med (2006) | √ | × | × | × |
| *Parapholis filiformis*(Roth) C.E.Hubb. | absent in Egypt but reported in error, Belgium, Netherlands, UK | 2, 6 | Boulos (1999-2005), POWO (2022), Euro+Med (2006), GBIF (2022), JSTOR (2022) | √ | × | × | ? |
| *Phalaris aquatica*L. | Transcaucasus, Canary Islands | 2, 6, 7 | Euro+Med (2006), POWO (2022) | √ | × | × | × |
| *Rostraria berythea* (Boiss. & Blanche) Holub | Iran, Iraq, Inner Anatolia, SA-AR regions of Jordon, Israel | 5, 6, 11 | POWO (2022), Hassler (2004-2022) | × | × | × | × |
| *Rostraria hispida*(Savi) Dogan | Kuwait and United Arab Emirates, doubtfully present in Egypt | 6, 11 | Boulos (1999-2005), POWO (2022), Euro+Med (2006), Med-Checklist (2016) | √ | × | × | × |
| *Trisetaria koelerioides*(Bornm. & Hack.) Melderis |  | 6 |  | √ | × | × | √ |
| **Polygalaceae Hoffmanns. & Link** | | | | | | | |
| *Polygala sinaica* var.*sinaica* | South Sinai | 6, 11 | Hassler (2004-2022), Täckholm (1974) | √ | √ | × | ■ |
| **Polygonaceae Juss.** | | | | | | | |
| *Persicaria obtusifolia*(Täckh. & Boulos) Greuter & Burdet | Nile valley, south Egypt | 6, 11 | CAI | × | √ | × | ■ |
| *Polygonum equisetiforme*Sm. | Macaronesia, Western Sahara to Central Asia. | 2, 5, 6, 12 | POWO (2022) | × | √ | × | × |
| *Rumex aegyptiacus* L. | Russia, Nile Valley, south Egypt | 3, 6, 11 | GBIF (2022), JSTOR (2022), CAI, CAIM | × | √ | × | × |
| *Rumex pictus*Forssk. | Arabian Peninsula | 6, 11 | POWO (2022) | × | √ | × | × |
| **Posidoniaceae Vines** | | | | | | | |
| *Posidonia oceanica*(L.) Delile |  | 6 |  | √ | × | √ | √ |
| **Primulaceae Batsch ex Borkh.** | | | | | | | |
| *Coris monspeliensis*L. | Somalia, Switzerland | 2, 6, 13 | POWO (2022), GBIF (2022) | √ | √ | √ | × |
| *Primula boveana*Decne. ex Duby | Saint Catherine, South Sinai | 6, 11 | Hassler (2004-2022), Täckholm (1974) | √ | √ | × | ■ |
| **Ranunculaceae Juss.** | | | | | | | |
| *Adonis dentata*Delile | Pakistan, Arabian Peninsula. | 5, 6, 11 | POWO (2022) | × | √ | × | × |
| *Delphinium ambiguum*L. | Central Europe, South Asia, Australia, USA and Canary Islands | 2, 7, 8, 9, 10, 19, 34, 35, 36 | POWO (2022), GBIF (2022), Hassler (2004-2022) | √ | √ | × | × |
| *Delphinium bovei*Decne. | Isthmic desert of Sinai | 6, 11 | Täckholm (1974) | √ | √ | × | ■ |
| *Nigella arvensis* subsp. *taubertii* (Brand) Maire | Ukraine, Europe, Southwest Asia | 2, 6, 11 | Euro+Med (2006), (Boulos 1999, 2005) | × | √ | × | × |
| *Nigella deserti*Boiss. | Iran, Iraq | 5, 6 | POWO (2022) | √ | × | × | × |
| *Ranunculus millefolius*Banks & Sol. | Iran, Iraq | 5, 6 | POWO (2022) | √ | √ | × | × |
| *Ranunculus sphaerospermus*Boiss. & Blanche | China and South Africa | 4, 6, 16 | POWO (2022) | √ | × | × | × |
| **Resedaceae Martinov** | | | | | | | |
| *Reseda odorata*L. | India, South Africa, Netherlands, doubtfully present in Egypt | 6, 16, 19 | Med-Checklist (2016), Euro+Med (2006), POWO (2022), Täckholm (1974), Boulos (1999-2005), GBIF (2022), JSTOR (2022), El-Beheiry et al. (2020) | × | √ | × | ? |
| *Reseda orientalis*(Müll.Arg.) Boiss. |  | 6 |  | √ | √ | × | √ |
| *Reseda phyteuma* L. | Madeira, E. Central Europe and South Transcaucasus. | 2, 6, 7 | POWO (2022) , Ahmed 2009 | √ | × | × | × |
| *Reseda lutea*L. | Canary Islands, Central Asia and Arabian Peninsula, S. Africa. | 5, 6, 7, 11, 16 | POWO (2022),Boulos (1999-2005) | × | √ | × | × |
| *Reseda pruinosa*Delile | Ethiopia, Sudan | 6, 12 | POWO (2022) | × | √ | √ | × |
| *Reseda urnigera*Webb | Deserts of Egypt and Israel | 6, 11 | Hassler (2004-2022) | × | √ | √ | ■ |
| **Rhamnaceae Juss.** | | | | | | | |
| *Rhamnus lycioides* subsp*. graeca* (Boiss. & Reut.) Tutin | Absent in Egypt and recorded in Egypt in Med-Checklist (2016) in error | 6 | POWO (2022), Boulos (1999-2005), Täckholm (1974) | × | √ | × | ? |
| *Rhamnus lycioides* subsp. *oleoides*(L.) Jahand. & Maire | Arabian Peninsula | 6, 11 | POWO (2022) | √ | √ | × | × |
| **Rubiaceae Juss.** | | | | | | | |
| *Crucianella aegyptiaca* L. | Arabian Peninsula | 6, 11 |  | √ | × | × | × |
| *Crucianella maritima*L. | Sweden, Canary Islands , SA-AR deserts and Oases of Egypt | 2, 6, 7, 11 | JSTOR (2022), African Plant Database (2022) | √ | √ | √ | × |
| *Galium canum*Req. ex DC. | Arabian Peninsula | 6, 11 | POWO (2022) | √ | × | × | × |
| *Galium verticillatum*Danthoine ex Lam. | Macaronesia, Iran, Somalia | 5, 6, 7, 13 | POWO (2022) | √ | × | √ | × |
| *Valantia columella*(Ehrenb. ex Boiss.) Bald. |  | 6 |  | √ | × | × | √ |
| **Santalaceae R.Br.** | | | | | | | |
| *Thesium humile* var. *humile* Vahl | Canary Islands, W. Iran and Arabian Peninsula. | 5, 6, 7, 11 | POWO (2022), Euro+Med (2006), GBIF (2022), Hassler (2004-2022) | × | × | √ | × |
| *Thesium humile* var. *maritima*(N.D.Simpson) F.M.Saad |  | 6 |  | √ | × | √ | √ |
| **Scrophulariaceae Juss.** | | | | | | | |
| *Verbascum letourneuxii* Asch. |  | 6 |  | √ | × | × | √ |
| **Solanaceae Juss.** | | | | | | | |
| *Lycium europaeum* L. | southwest Asia , Canary Islands | 6, 7, 11 | Boulos (1999-2005), Euro+Med (2006) | × | × | √ | × |
| *Lycium schweinfurthii* var. *aschersonii* (Dammer) Feinbrun |  | 6 |  | √ | √ | √ | √ |
| *Lycium schweinfurthii* var. *schweinfurthii* Dammer in Engl. | Mauritania, Canary Islands | 6, 7, 12 | GBIF (2022), Hassler (2004-2022) | √ | √ | √ | × |
| *Solanum sinaicum*Boiss. | Macaronesia, North Africa to Eritrea and Mozambique, Europe to China and Arabian Peninsula, Indian Subcontinent | 2, 4, 5, 6, 7, 11, 12, 13, 15, 19 | POWO (2022) | √ | × | × | × |
| **Zygophyllaceae R.Br.** | | | | | | | |
| *Zygophyllum aegyptium*Hosny | Wadi Sudr, Sinai | 6, 11 | Morsy et al. (2015) | √ | × | √ | ■ |
